# Supplementary material for: Comparative evaluation of cardiovascular risks among nine FDA-approved VEGFR-TKIs in patients with solid tumors: a Bayesian network analysis of randomized controlled trials
Source: PubMed Central journal article supplement (PMC8236482; doi:10.1007/s00432-021-03521-w), 2021-03-16

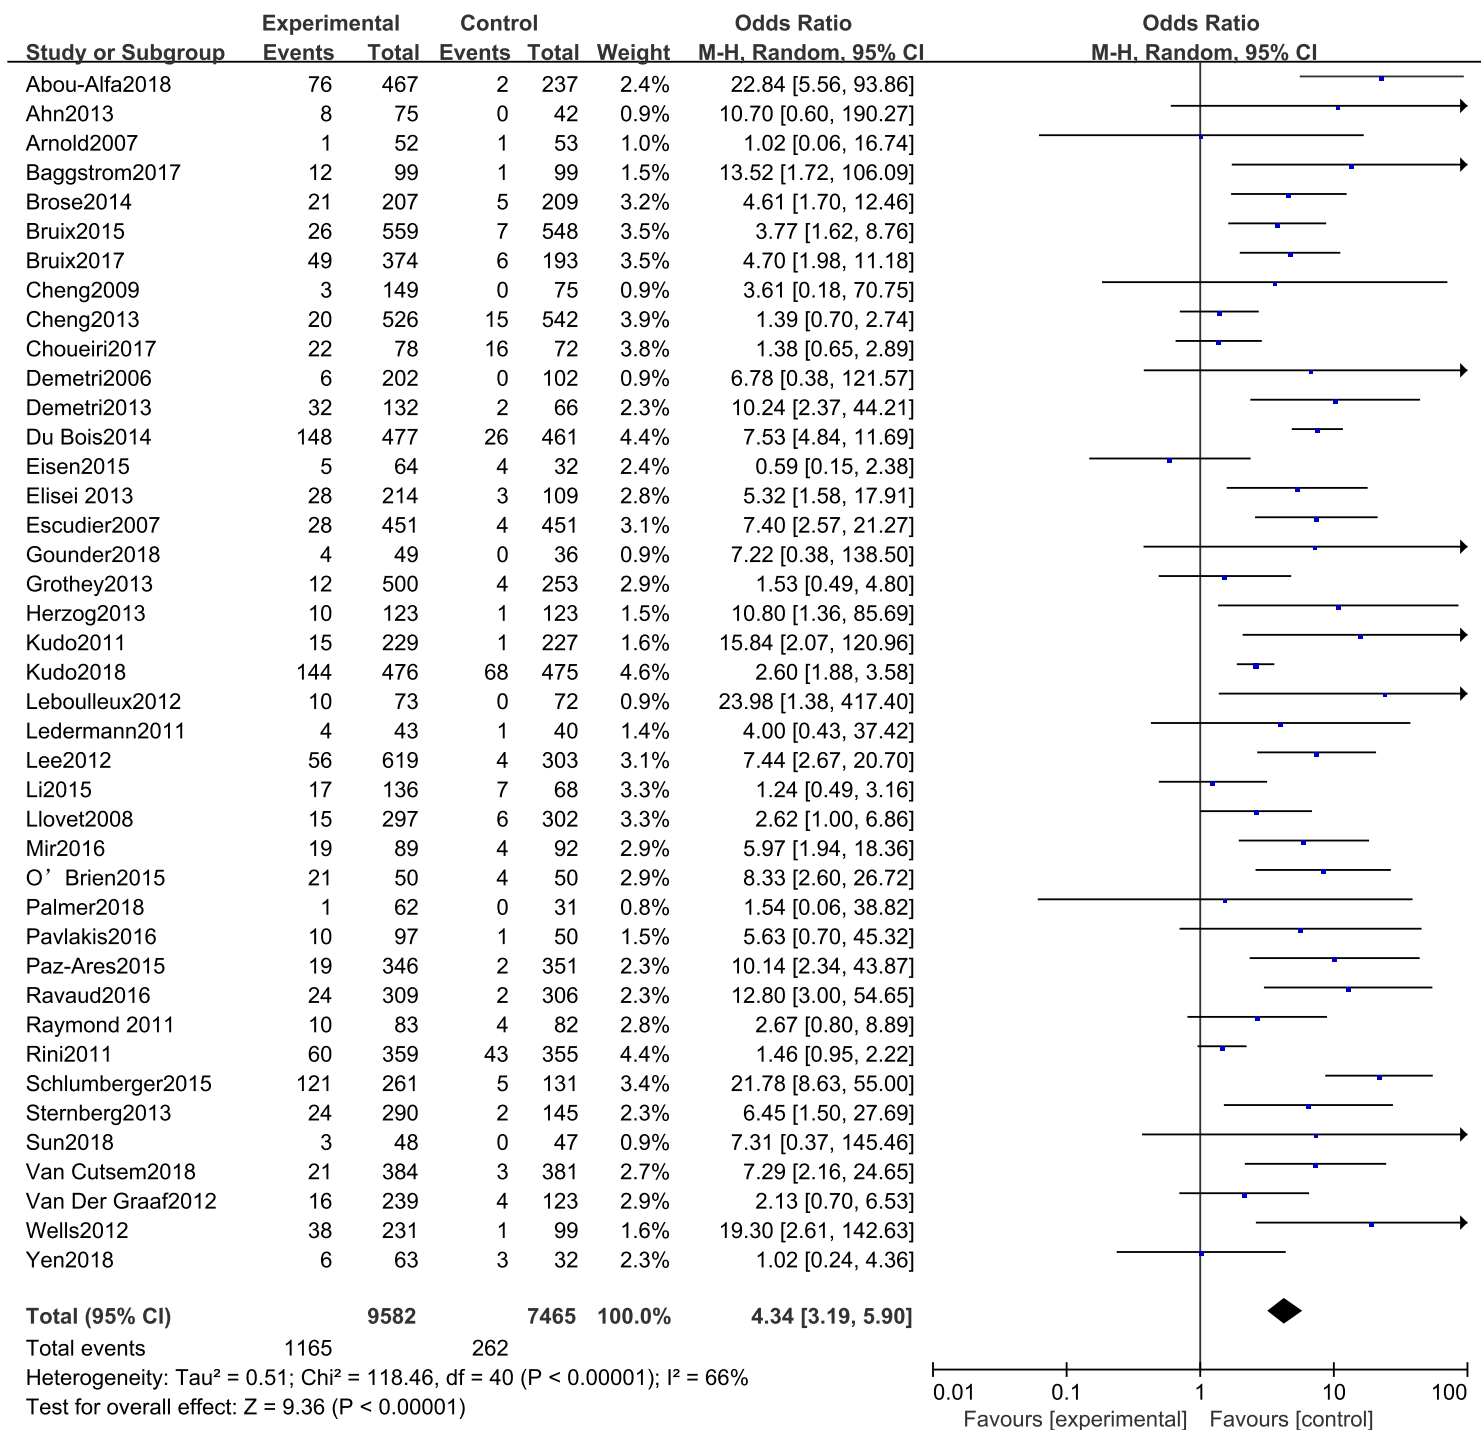

Supplement: 432_2021_3521_MOESM7_ESM.pdf [file 432_2021_3521_MOESM7_ESM.pdf]
